# Supplementary material for: Managing moderate-to-severe paediatric asthma: a scoping review of the efficacy and safety of fluticasone propionate/salmeterol
Source: PubMed Central journal article supplement — BMJ Open Respir Res. 2023 Aug 24;10(1):e001706. doi: 10.1136/bmjresp-2023-001706 (PMC10450074; doi:10.1136/bmjresp-2023-001706), 2023-08-24
Supplement: bmjresp-2023-001706supp001.pdf [file bmjresp-2023-001706supp001.pdf]

**Supplementary table 1: List of search topics and related search strings used in the literature searches**

| Search Topic    | Search string                                                                                                                                                                                                                                                                                                                                          |
|-----------------|--------------------------------------------------------------------------------------------------------------------------------------------------------------------------------------------------------------------------------------------------------------------------------------------------------------------------------------------------------|
| Age Range       | ((seretide) OR (fluticasone propionate salmeterol)) AND (asthma) AND ((pediatric) OR (pediatric) OR (4-11 years) OR (12-16 years) OR (children) OR (preschool) OR (schoolchildren) OR (school children))                                                                                                                                               |
| Asthma severity | ((seretide) OR (fluticasone propionate salmeterol)) AND ((asthma) AND ((moderate) OR (severe) OR (moderate to severe) OR (moderate or severe))) AND ((pediatric) OR (pediatric) OR (4-11 years) OR (12-16 years) OR (children) OR (preschool) OR (schoolchildren) OR (school children))                                                                |
| High dose ICS   | ((seretide) OR (fluticasone propionate salmeterol)) AND (asthma) AND ((pediatric) OR (pediatric) OR (4-11 years) OR (12-16 years) OR (children) OR (preschool) OR (schoolchildren) OR (school children)) AND ((high dose ICS) OR (high dose inhaled corticosteroids)) OR (high dose ICS monotherapy) OR (high dose inhaled corticosteroid monotherapy) |
| Low dose ICS    | ((seretide) OR (fluticasone propionate salmeterol)) AND (asthma) AND ((pediatric) OR (pediatric) OR (4-11 years) OR (12-16 years) OR (children) OR (preschool) OR (schoolchildren) OR (school children)) AND ((low dose ICS) OR (low dose inhaled                                                                                                      |

|                        |                                                                                                                                                                                                                                                                                               |
|------------------------|-----------------------------------------------------------------------------------------------------------------------------------------------------------------------------------------------------------------------------------------------------------------------------------------------|
|                        | corticosteroids)) OR (low dose ICS monotherapy) OR (low dose inhaled corticosteroid monotherapy)                                                                                                                                                                                              |
| LTRA                   | ((seretide) OR (fluticasone propionate salmeterol)) AND (asthma)) AND ((pediatric) OR (pediatric) OR (4-11 years) OR (12-16 years) OR (children) OR (preschool) OR (schoolchildren) OR (school children)) AND ((LTRA) OR (leukotriene receptor antagonist therapy))                           |
| Exacerbation reduction | ((seretide) OR (fluticasone propionate salmeterol)) AND (asthma)) AND ((pediatric) OR (pediatric) OR (4-11 years) OR (12-16 years) OR (children) OR (preschool) OR (schoolchildren) OR (school children)) AND (exacerbation reduction)                                                        |
| Night-time awakening   | ((seretide) OR (fluticasone propionate salmeterol)) AND (asthma)) AND ((pediatric) OR (pediatric) OR (4-11 years) OR (12-16 years) OR (children) OR (preschool) OR (schoolchildren) OR (school children)) AND ((night-time awakening) OR (nocturnal awakening) OR (nighttime) OR (awakening)) |
| Exacerbation           | ((seretide) OR (fluticasone propionate salmeterol)) AND (asthma)) AND ((pediatric) OR (pediatric) OR (4-11 years) OR (12-16 years) OR (children) OR (preschool) OR (schoolchildren) OR (school children)) AND (exacerbation)                                                                  |
| Symptom                | ((seretide) OR (fluticasone propionate salmeterol)) AND (asthma)) AND ((pediatric) OR (pediatric) OR (4-11 years) OR (12-16 years) OR (children) OR (preschool) OR (schoolchildren) OR (school children)) AND (symptom)                                                                       |

|                 |                                                                                                                                                                                                                                                                                                                                                                                                                                 |
|-----------------|---------------------------------------------------------------------------------------------------------------------------------------------------------------------------------------------------------------------------------------------------------------------------------------------------------------------------------------------------------------------------------------------------------------------------------|
| control         | years) OR (children) OR (preschool) OR (schoolchildren) OR (school children)) AND ((symptom control) OR (asthma control))                                                                                                                                                                                                                                                                                                       |
| Lung function   | ((seretide) OR (fluticasone propionate salmeterol)) AND (asthma)) AND ((pediatric) OR (pediatric) OR (4-11 years) OR (12-16 years) OR (children) OR (preschool) OR (schoolchildren) OR (school children)) AND ((lung function) OR (FEV1))                                                                                                                                                                                       |
| Asthma symptoms | ((seretide) OR (fluticasone propionate salmeterol)) AND (asthma)) AND ((pediatric) OR (pediatric) OR (4-11 years) OR (12-16 years) OR (children) OR (preschool) OR (schoolchildren) OR (school children)) and ((shortness of breath) or (wheezing) OR (cough))                                                                                                                                                                  |
| Asthma symptoms | ((seretide) OR (fluticasone propionate salmeterol)) AND (asthma)) AND ((pediatric) OR (pediatric) OR (4-11 years) OR (12-16 years) OR (children) OR (preschool) OR (schoolchildren) OR (school children)) and ((SABA) OR (short-acting beta agonist) OR (rescue medication) OR (short acting bronchodilator))                                                                                                                   |
| Safety          | ((seretide) OR (fluticasone propionate salmeterol)) AND (asthma)) AND ((pediatric) OR (pediatric) OR (4-11 years) OR (12-16 years) OR (children) OR (preschool) OR (schoolchildren) OR (school children)) AND ((safety) OR (growth) OR (development) OR (caregiver) OR (hospitalisation) OR (hospitalization) OR (emergency intervention) OR (infection) OR (systemic effect) OR (Cushing's syndrome) OR (adrenal suppression)) |

Supplementary table 2: Details of selected studies and outcomes relevant to FP/SAL

| Author(s), year            | Title                                                                                                                                                    | Study type | Age range (years) | Total participants studied (n) | Comorbidities /phenotypes reported                 | Device for FP/SAL delivery                                                   | Treatment duration/ observation period | Relevant outcomes                                                                                                                                                     |
|----------------------------|----------------------------------------------------------------------------------------------------------------------------------------------------------|------------|-------------------|--------------------------------|----------------------------------------------------|------------------------------------------------------------------------------|----------------------------------------|-----------------------------------------------------------------------------------------------------------------------------------------------------------------------|
| Akashi K, et al., 2016     | Optimal step-down approach for pediatric asthma controlled by salmeterol/fluticasone: A randomized, controlled trial (OSCAR study)                       | RCT        | 5–15              | 128                            | NA                                                 | pMDI with spacer                                                             | 12 weeks                               | For step-down approaches, halving the dose of FP/SAL and switching to FP alone are both optimal approaches.                                                           |
| Bracamonte T, et al., 2005 | Efficacy and safety of salmeterol/fluticasone propionate combination delivered by the Diskus or pressurised metered-dose inhaler in children with asthma | RCT        | 4–11              | 428                            | Allergic rhinitis (71% FP/SAL group; 79% FP group) | Randomized to DPI (Diskus™) or CFC-free pMDI<br><br>Stratified by spacer use | 12 weeks                               | When administered through either Diskus or pMDI, FP/SAL (100/50 mcg) is very effective and clinically equivalent and improved both lung function and asthma symptoms. |

|                         |                                                                                                                          |     |      |     |                                                                                                                                                                     |                                                                                                                                  |          |                                                                                                                                                                                                                                                                                                                                                                                            |
|-------------------------|--------------------------------------------------------------------------------------------------------------------------|-----|------|-----|---------------------------------------------------------------------------------------------------------------------------------------------------------------------|----------------------------------------------------------------------------------------------------------------------------------|----------|--------------------------------------------------------------------------------------------------------------------------------------------------------------------------------------------------------------------------------------------------------------------------------------------------------------------------------------------------------------------------------------------|
| de Blic J, et al., 2009 | Salmeterol/fluticasone propionate vs. double dose fluticasone propionate on lung function and asthma control in children | RCT | 4–11 | 321 | Allergic rhinitis (71% FP/SAL group; 76% FP group)<br><br>Eczema (41% FP/SAL group; 38% FP group)<br><br>Positive SPT/specific IgE (85% FP/SAL group; 91% FP group) | DPI (Diskus™)                                                                                                                    | 12 weeks | FP/SAL had a significant improvement in mean percentage rescue medication-free days (Weeks 1–12) when compared with FPL (difference, 1.4; 95% CI, 0.0–3.4), p=0.025.<br><br>Switching children, symptomatic on low-dose ICS, to FP/SAL (100/50 mcg bid) is at least as effective as doubling the dose of ICS (FP 200 mcg bid at improving clinical outcomes and achieving asthma control). |
| Gappa M, et al, 2009    | Add-on salmeterol compared to double dose fluticasone in pediatric asthma: a double-blind randomized trial (VIAPAED)     | RCT | 4–16 | 283 | NA                                                                                                                                                                  | DPI (Diskus™)<br><br>A spacer device<br><br>(Volumatic) was provided for children <7 years) and for those patients who needed it | 8 weeks  | FP/SAL (100/50 mcg bid) was more effective than a double dose of ICS in children with persistent asthma inadequately controlled on low-dose ICS alone.<br><br>FP/SAL resulted in significantly more rescue medication-free                                                                                                                                                                 |

|                                |                                                                                         |     |      |     |                                                    |  |          |                                                                                                                                                                                                                                                                                                                                      |
|--------------------------------|-----------------------------------------------------------------------------------------|-----|------|-----|----------------------------------------------------|--|----------|--------------------------------------------------------------------------------------------------------------------------------------------------------------------------------------------------------------------------------------------------------------------------------------------------------------------------------------|
|                                |                                                                                         |     |      |     |                                                    |  |          | days (8.0%; 95% CI, 0.6–15.3) and symptom-free days (8.7%; (95% CI, 1.2–16.3) compared to a double dose of FP alone.                                                                                                                                                                                                                 |
| Lemanske Jr. R F, et al., 2010 | Step-up therapy for children with uncontrolled asthma receiving inhaled corticosteroids | RCT | 6–17 | 182 | Allergic rhinitis (71% FP/SAL group; 79% FP group) |  | 16 weeks | <p>Step-up with LABA was significantly more likely to provide the best response in children with asthma.</p> <p>A best response to ICS or LTRA step-up also reported in many children which highlights the need for individual monitoring and adjustment of therapy for each child with asthma when considering step-up therapy.</p> |

|                         |                                                                                                                                           |     |      |     |    |                         |          |                                                                                                                                                                                    |
|-------------------------|-------------------------------------------------------------------------------------------------------------------------------------------|-----|------|-----|----|-------------------------|----------|------------------------------------------------------------------------------------------------------------------------------------------------------------------------------------|
| Malone R, et al., 2005  | The safety of twice-daily treatment with fluticasone propionate and salmeterol in pediatric patients with persistent asthma               | RCT | 4–11 | 203 | NA | DPI (Advair Diskus™)    | 12 weeks | Treatment for 12 weeks with FP/SAL (100/50 mcg bid) is well-tolerated in children with persistent asthma and can provide a treatment option for those not controlled by ICS alone. |
| Murray CS, et al., 2010 | Effect of addition of salmeterol versus doubling the dose of fluticasone propionate on specific airway resistance in children with asthma | RCT | 4-11 | 24  | NA | DPI (Accuhaler/Diskus™) | 6 weeks  | FP/SAL has better improvement in sR <sub>aw</sub> than a high-dose FP in children with moderate-to-severe persistent asthma.                                                       |

|                         |                                                                                                                                                     |     |      |     |    |               |          |                                                                                                                                                                                                                                |
|-------------------------|-----------------------------------------------------------------------------------------------------------------------------------------------------|-----|------|-----|----|---------------|----------|--------------------------------------------------------------------------------------------------------------------------------------------------------------------------------------------------------------------------------|
| Murray J, et al., 2011  | Evaluation of fluticasone propionate and fluticasone propionate/salmeterol combination on exercise in pediatric and adolescent patients with asthma | RCT | 4–17 | 231 | NA | DPI (Diskus™) | 4 weeks  | FP/SAL and FP both protected against a decrease in FEV <sub>1</sub> following exercise.<br><br>Therapy with FP/SAL (100/50 mcg bid) can provide additional control if exercise induced asthma is not controlled with FP alone. |
| Nguyen WT, et al., 2005 | Maintenance asthma treatment with fluticasone/salmeterol combination via Diskus: effect on outcomes in inner-city children enrolled in TennCare     | RCT | 4–17 | 39  | NA | DPI (Diskus™) | 52 weeks | FP/SAL is associated with lower risk of exacerbations, ED visits and hospitalizations in inner city children with asthma.                                                                                                      |



|                            |                                                                                                                                                                                                              |               |      |                      |    |               |            |                                                                                                                                                                                                                         |
|----------------------------|--------------------------------------------------------------------------------------------------------------------------------------------------------------------------------------------------------------|---------------|------|----------------------|----|---------------|------------|-------------------------------------------------------------------------------------------------------------------------------------------------------------------------------------------------------------------------|
| O'Connor R D, et al., 2008 | Observational study of the association of Fluticasone propionate/salmeterol via a single device and inhaled corticosteroid use in children on asthma related emergency department and hospitalization visits | Observational | 4–11 | 751,001 <sup>d</sup> | NA | NA            | 4.25 years | FP/SAL was associated with lower asthma-related ED visits and hospitalizations in children aged 4–11 years when compared with ICS alone.                                                                                |
| Pearlman D, et al., 2009   | Fluticasone propionate/salmeterol and exercise-induced asthma in children with persistent asthma                                                                                                             | RCT           | 4–17 | 248                  | NA | DPI (Diskus™) | 4 weeks    | 64% of subjects with <10% decrease in FEV1 following exercise challenge for FP/SAL compared with 47% for FP monotherapy (P=0.026)<br><br>FP/SAL produced greater protection from exercise induced bronchospasm than FP. |

|                        |                                                                                                                               |     |      |     |    |                          |          |                                                                                                                                                                                                                                                                                                                                                                                                                             |
|------------------------|-------------------------------------------------------------------------------------------------------------------------------|-----|------|-----|----|--------------------------|----------|-----------------------------------------------------------------------------------------------------------------------------------------------------------------------------------------------------------------------------------------------------------------------------------------------------------------------------------------------------------------------------------------------------------------------------|
| Płoszczuk, et al, 2018 | Efficacy and safety of fluticasone propionate/formoterol fumarate in pediatric asthma patients: a randomized controlled trial | RCT | 5–12 | 512 | NA | pMDI (Seretide Evohaler) | 12 weeks | FP/SAL and FP/FORM were superior to FP monotherapy for the change from pre-dose FEV <sub>1</sub> at baseline to 2-hour post-dose FEV <sub>1</sub> over a 12-week period.<br><br>Measures of lung function (FEF <sub>25</sub> , FEF <sub>50</sub> , FEF <sub>75</sub> and FEF <sub>25–75</sub> ) showed greater predose and 2-hour post dose changes from baseline for FP/SAL and FP/FORM in comparison with FP monotherapy. |
|------------------------|-------------------------------------------------------------------------------------------------------------------------------|-----|------|-----|----|--------------------------|----------|-----------------------------------------------------------------------------------------------------------------------------------------------------------------------------------------------------------------------------------------------------------------------------------------------------------------------------------------------------------------------------------------------------------------------------|

|                         |                                                                                                                                                                                                                                     |               |                |                      |                             |               |          |                                                                                                                                                                                                                                                  |
|-------------------------|-------------------------------------------------------------------------------------------------------------------------------------------------------------------------------------------------------------------------------------|---------------|----------------|----------------------|-----------------------------|---------------|----------|--------------------------------------------------------------------------------------------------------------------------------------------------------------------------------------------------------------------------------------------------|
| Prazma CM, et al., 2015 | The association between seasonal asthma exacerbations and viral respiratory infections in a pediatric population receiving inhaled corticosteroid therapy with or without long-acting beta-adrenoceptor agonist: a randomized study | RCT           | 4–11           | 339                  | One or more allergies (60%) | DPI (Diskus™) | 16 weeks | In the 7 days before and after an exacerbation, FP/SAL was associated with fewer symptoms and reduction in SABA therapy use when compared with FP monotherapy.                                                                                   |
| Spahn J, et al., 2009   | Dispensing of fluticasone propionate/salmeterol combination in the summer and asthma-related outcomes in the fall                                                                                                                   | Observational | 4–11;<br>12–18 | 386,116 <sup>a</sup> | NA                          | NA            | 4 years  | Treatment with FP/SAL in the summer associated with lower risk of asthma-related ED visits and hospitalizations in the fall.<br><br>Risk reduction not noted in patients who collected a prescription for FP/SAL in the fall but not the summer. |

|                          |                                                                                                                                                                        |               |      |                   |                                                                   |               |         |                                                                                                                                                                                           |
|--------------------------|------------------------------------------------------------------------------------------------------------------------------------------------------------------------|---------------|------|-------------------|-------------------------------------------------------------------|---------------|---------|-------------------------------------------------------------------------------------------------------------------------------------------------------------------------------------------|
| Stanford R, et al., 2013 | Fluticasone propionate-salmeterol versus inhaled corticosteroids plus montelukast: outcomes study in pediatric patients with asthma                                    | Observational | 4–11 | 3001 <sup>b</sup> | Allergic rhinitis (42% FP/SAL group; 47.9% ICS/montelukast group) | NA            | 8 years | FP/SAL reported to have with reduced utilization of asthma-related healthcare services and costs when compared with ICS+LTRA and should be considered in patients with persistent asthma. |
| Stauffer J, et al., 2007 | Fluticasone propionate/salmeterol administered via Diskus provides protection against activity induced bronchospasm in children and adolescents with persistent asthma | RCT           | 4–17 | 479               | NA                                                                | DPI (Diskus™) | 4 weeks | Regular dosing of FP/SAL (100/50 mcg bid) improved asthma control and provided protection against EIB in children with persistent asthma.                                                 |

|                                  |                                                                                                                                                      |               |            |                   |                                        |               |          |                                                                                                                                                                                                                                   |
|----------------------------------|------------------------------------------------------------------------------------------------------------------------------------------------------|---------------|------------|-------------------|----------------------------------------|---------------|----------|-----------------------------------------------------------------------------------------------------------------------------------------------------------------------------------------------------------------------------------|
| Stempel D, et al., 2006          | Resource utilization with fluticasone propionate and salmeterol in a single inhaler compared with other controller therapies in children with asthma | Observational | 4–17       | 9192 <sup>c</sup> | NA                                     | NA            | 1 year   | FP/SAL was associated with reduced necessity for SABA reliever therapy and OCS therapy when compared with various other controller therapies (FP alone, MON, ICS+SAL given separately, and ICS+MON) in controller-naïve children. |
| Stempel D, et al., 2016          | Safety of adding salmeterol to fluticasone propionate in children with asthma                                                                        | RCT           | 4–11       | 6208              | NA                                     | DPI (Diskus™) | 26 weeks | A higher risk of severe asthma events among children 4–11 years of age was not reported for FP/SAL compared with FP alone.                                                                                                        |
| Vaessen-Verberne A, et al., 2010 | Combination therapy salmeterol/fluticasone versus doubling dose of fluticasone in children with asthma                                               | RCT           | 6–16 years | 158               | Atopy (77% FP/SAL group; 73% FP group) | DPI (Diskus™) | 26 weeks | Efficacy of FP/SAL is equal to a double dose of FP monotherapy in measures of symptom control and lung function in children with moderate asthma symptomatic on ICS monotherapy.                                                  |

|                                |                                                                                                                                             |     |      |     |                                              |               |          |                                                                                                                                                                                                                                                 |
|--------------------------------|---------------------------------------------------------------------------------------------------------------------------------------------|-----|------|-----|----------------------------------------------|---------------|----------|-------------------------------------------------------------------------------------------------------------------------------------------------------------------------------------------------------------------------------------------------|
| Van den Berg N J, et al., 2000 | Salmeterol/fluticasone propionate (50/100 mcg) in combination in a Diskus inhaler (Seretide™) is effective and safe in children with asthma | RCT | 4–11 | 257 | Atopy (64% FP/SAL group; 67% SAL + FP group) | DPI (Diskus™) | 12 weeks | Significant improvement in lung function and symptoms in children with asthma treated with FP/SAL (100/50 mcg bid).<br><br>Combination Diskus™ shown to be as safe and effective as concurrent therapy given via two separate Diskus™ inhalers. |
|--------------------------------|---------------------------------------------------------------------------------------------------------------------------------------------|-----|------|-----|----------------------------------------------|---------------|----------|-------------------------------------------------------------------------------------------------------------------------------------------------------------------------------------------------------------------------------------------------|

<sup>a</sup>Total evaluated observations of healthcare claims identified from a large managed database over a 42-month period. <sup>b</sup>Number of patients identified from a health insurance database with at least one pharmacy claim for FP/SAL, any ICS or MON during the 8-year study period.

<sup>c</sup>Number of patients identified from a healthcare database with a medical claim for asthma and initial pharmacy claim for FP/SAL, FP, other ICS, SAL, or MON.

<sup>d</sup>Number of patient observations identified with asthma and claims for FP/SAL or ICS over a 50-month period.

bid, twice daily; CFC, chlorofluorocarbon; ED, emergency department; FEV<sub>1</sub>, forced expiratory volume in one second; FEF, forced expiratory flow; FEF<sub>25</sub>, forced expiratory flow at 25% vital capacity; FEF<sub>50</sub>, forced expiratory flow at 50% vital capacity; FEF<sub>75</sub>, forced expiratory flow at 75% vital capacity; FEF<sub>25–75</sub>, forced expiratory flow at 25–75% vital capacity; FP, fluticasone propionate; FP/FORM, fluticasone propionate/formoterol; ICS, inhaled corticosteroid; LABA, long-acting β<sub>2</sub>-agonist; LTRA, leukotriene receptor antagonist therapy; MON, montelukast; OCS, oral corticosteroids; PEF, peak expiratory flow; pMDI, pressurized metered dose inhaler; RCT, randomized controlled trial; SABA, short-acting β<sub>2</sub>-agonist; SAL, salmeterol; SPT, skin prick test; S<sub>Raw</sub>, specific airway resistance.
